# Supplementary material for: Abundant Allelochemicals and the Inhibitory Mechanism of the Phenolic Acids in Water Dropwort for the Control of Microcystis aeruginosa Blooms
Source: MDPI journal article supplement (doi:10.3390/plants10122653), 2021-12-02
Supplement: s1 [file s1]

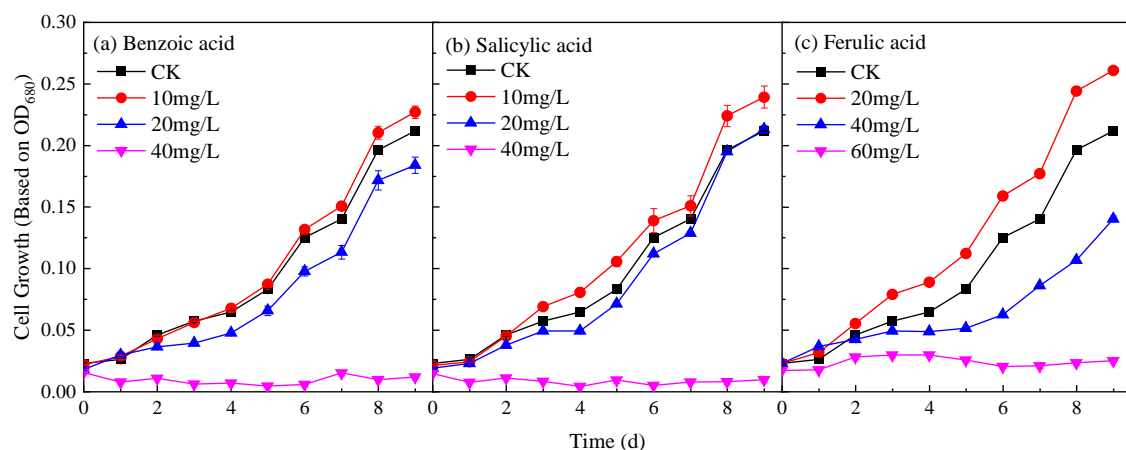

(A) Change of the cell density for the *M. aeruginosa* with different concentrations of phenolic acids.

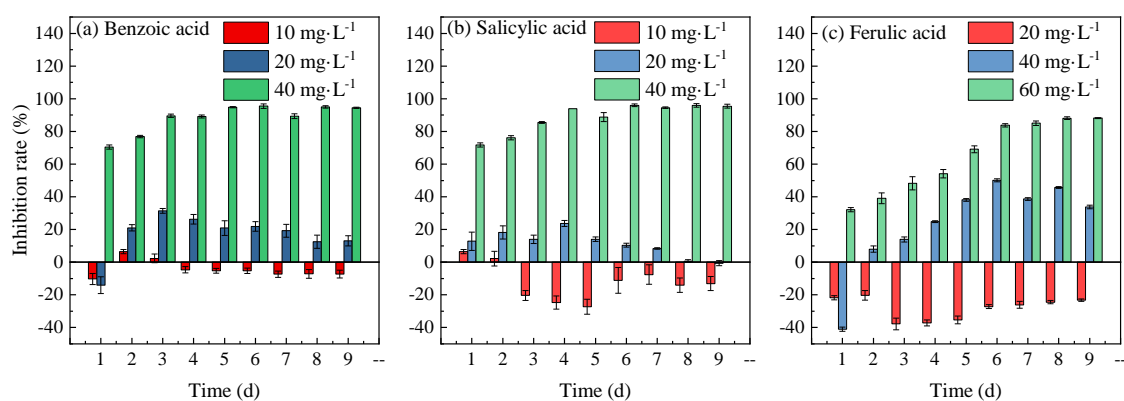

(B) Inhibition rate of the *M. aeruginosa* with different concentrations of phenolic acids.

**Figure S1.** Effects of different concentrations of ferulic acid, salicylic acid and benzoic acid, respectively, on the growth of *M. aeruginosa*. The data were reported as mean  $\pm$  standard deviation.

**Table S1.** Targeted metabolomics analysis for the phenolic acids in the whole plant of water dropwort at juvenile stage

| Chemicals ( $\mu\text{g}\cdot\text{g}^{-1}$ , FW) | Root                         | Stem                        | Leaf                         |
|---------------------------------------------------|------------------------------|-----------------------------|------------------------------|
| Gallic acid                                       | $0.3200 \pm 0.0010\text{b}$  | $0.2553 \pm 0.1058\text{b}$ | $3.2610 \pm 0.0090\text{a}$  |
| Vanillic acid                                     | $0.713 \pm 0.0090\text{b}$   | $0.5150 \pm 0.0480\text{b}$ | $4.5228 \pm 0.3128\text{a}$  |
| Caffeic acid                                      | $7.7050 \pm 0.5230\text{b}$  | $2.9210 \pm 0.1210\text{c}$ | $37.2612 \pm 1.5658\text{a}$ |
| 4-Hydroxycinnamic acid                            | $3.8575 \pm 0.2045\text{a}$  | $1.7450 \pm 0.6495\text{a}$ | $3.8125 \pm 0.2305\text{a}$  |
| Ferulic acid                                      | $11.0535 \pm 0.4375\text{b}$ | $8.1765 \pm 0.2365\text{b}$ | $15.1996 \pm 1.1453\text{a}$ |
| Protocatechualdehyde                              | $0.2850 \pm 0.0250\text{b}$  | $0.1230 \pm 0.0030\text{b}$ | $0.8722 \pm 0.0562\text{a}$  |
| 4-Hydroxybenzoic acid                             | $1.3393 \pm 0.2315\text{a}$  | $0.7445 \pm 0.0055\text{a}$ | $1.2471 \pm 0.1164\text{a}$  |
| Vanillin                                          | $1.3397 \pm 0.2295\text{a}$  | $0.7375 \pm 0.0255\text{a}$ | $1.2886 \pm 0.1712\text{a}$  |
| Syringaldehyde                                    | $0.1527 \pm 0.0199\text{b}$  | $0.1420 \pm 0.0484\text{b}$ | $1.2763 \pm 0.0868\text{a}$  |
| roxy-3,5-dimethoxycinnamic acid                   | $0.0600 \pm 0.0040\text{b}$  | $0.0985 \pm 0.0135\text{b}$ | $0.9310 \pm 0.1520\text{a}$  |
| Phe(L-Phenylalanine)                              | $0.0185 \pm 0.0055\text{b}$  | $0.0163 \pm 0.0023\text{b}$ | $0.0679 \pm 0.0089\text{a}$  |
| 3,4-Dihydroxybenzoic acid                         | $0.0670 \pm 0.0080\text{b}$  | $0.0797 \pm 0.031\text{b}$  | $0.1653 \pm 0.0148\text{a}$  |
| Syringic acid                                     | $0.0675 \pm 0.0095\text{a}$  | $0.0183 \pm 0.0030\text{b}$ | $0.1034 \pm 0.0034\text{a}$  |
| Benzoic acid                                      | $0.1390 \pm 0.0169\text{a}$  | $0.0867 \pm 0.0148\text{b}$ | $0.1407 \pm 0.0082\text{a}$  |
| Trans-Cinnamic acid                               | $0.0153 \pm 0.0029\text{b}$  | $0.0185 \pm 0.0005\text{b}$ | $0.1175 \pm 0.0165\text{a}$  |
| L-Epicatechin                                     | $0.0017 \pm 0.0003\text{a}$  | $0.0003 \pm 0.0003\text{b}$ | $0.0015 \pm 0.0003\text{a}$  |
| Salicylic acid                                    | $0.0210 \pm 0.0068\text{b}$  | $0.0130 \pm 0.0038\text{b}$ | $0.0453 \pm 0.0085\text{a}$  |
| Hydrocinnamic acid                                | $0.04750 \pm 0.0015\text{a}$ | $0.0017 \pm 0.0003\text{c}$ | $0.0116 \pm 0.0003\text{b}$  |

Note: Lowercase letters indicate the significant difference of the same phenolic acid in different organs. Plus and minus signs indicate standard deviation.
